# Supplementary material for: Feasibility of automated surveillance of implantable devices in orthopaedics via clinical data warehouse: the Studio study
Source: Springer Nature journal article supplement (doi:10.1186/s12911-024-02697-8), 2024-11-04
Supplement: MOESM1 [file 12911_2024_2697_MOESM1_ESM.pdf]

## Appendices

**Table A.1**  
Number of stays and patients included in the cohort for a total hip, knee or shoulder arthroplasty (THKSA) between 2010 and 2019, by joint and center.

|                                 | THA             | TKA             | TSA           | Total          |
|---------------------------------|-----------------|-----------------|---------------|----------------|
| <b>Stays included, n (%)</b>    |                 |                 |               |                |
| Overall                         | 4,627<br>(53.8) | 3,030<br>(35.2) | 943<br>(10.9) | 8,600<br>(100) |
| Center I                        | 2,028<br>(48.5) | 1,575<br>(37.7) | 576<br>(13.8) | 4,179<br>(100) |
| Center II                       | 2,599<br>(58.8) | 1,455<br>(32.9) | 367<br>(8.3)  | 4,421<br>(100) |
| <b>Patients included, n (%)</b> |                 |                 |               |                |
| Overall                         | 4,113<br>(54.2) | 2,630<br>(34.7) | 844<br>(11.1) | 7,587<br>(100) |
| Center I                        | 1,811<br>(49.3) | 1,362<br>(37.1) | 499<br>(13.6) | 3,672<br>(100) |
| Center II                       | 2,302<br>(58.8) | 1,268<br>(32.4) | 345<br>(8.8)  | 3,915<br>(100) |

**Table A.2**  
French CPT codes included in cohort by surgery type and articulation.

|          | Arthroplasty*                      | French CPT code               | Included |
|----------|------------------------------------|-------------------------------|----------|
| Hip      | One stage IMD revision             | NEKA001-009                   | 0        |
|          | IMD revision                       | NEMA011-018; NBMA811; NEGA004 | 0        |
|          | Native joint replacement           | NEKA010-021                   | 12       |
|          | 2 <sup>nd</sup> stage IMD revision | NELA001-003                   | 0        |
| Knee     | One stage IMD revision             | NFKA001-005                   | 0        |
|          | IMD revision                       | NFMA006                       | 0        |
|          | Native joint replacement           | NFKA006-009                   | 4        |
|          | 2 <sup>nd</sup> stage IMD revision | NFLA001-002                   | 0        |
| Shoulder | One stage IMD revision             | MEKA001-004                   | 0        |
|          | IMD revision                       | MEMA009                       | 0        |
|          | Native joint replacement           | MEKA005-010                   | 6        |
|          | 2 <sup>nd</sup> stage IMD revision | MELA001                       | 0        |
| Total    |                                    | 53                            | 22       |

\*French translation: « changement de prothèse en 1 temps » (One stage IMD revision); « réintervention pour changement de tout ou partie de la prothèse » (IMD revision); « remplacement de l'articulation native » (native joint replacement) and « repose de prothèse » (2<sup>nd</sup> stage IMD revision).

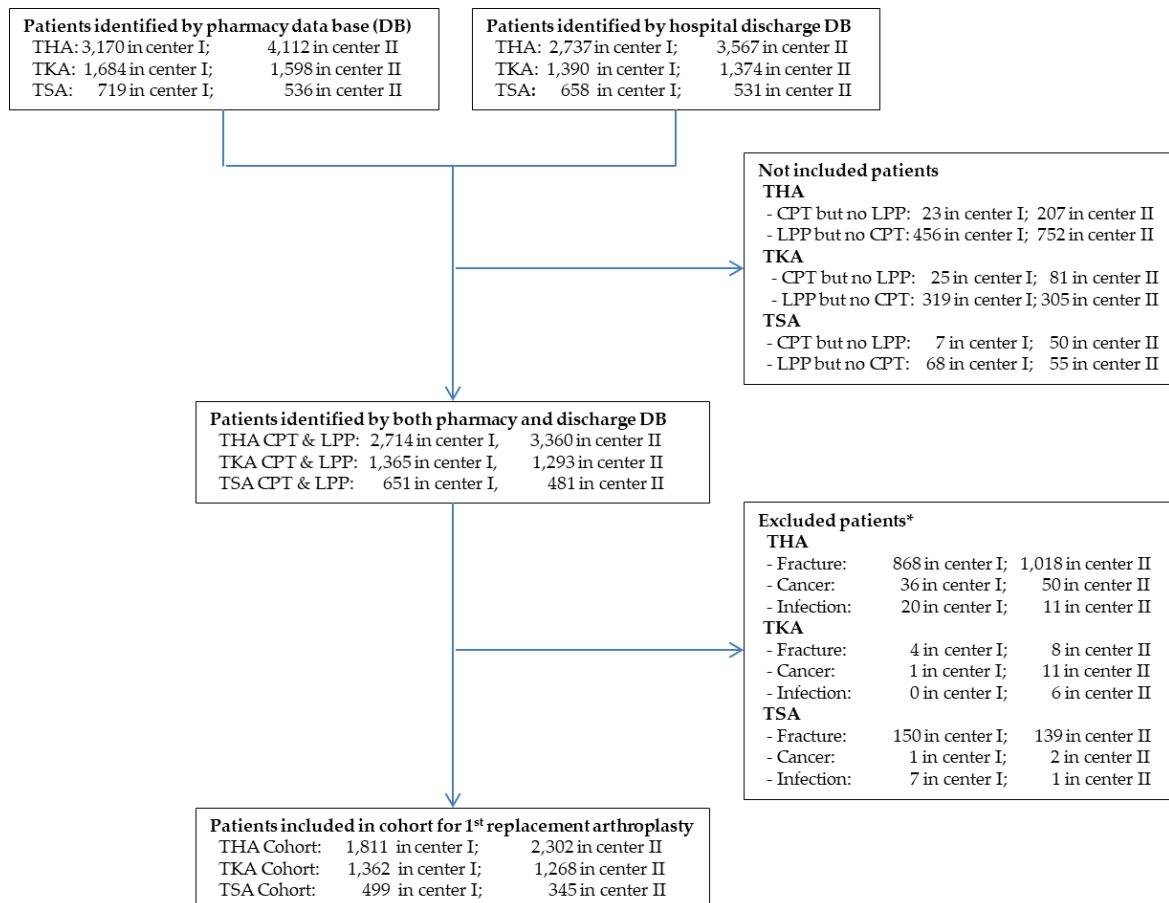

**Figure A.1**  
**Flow chart of patients, detailed by joint cohort of the hip (THA), knee (TKA) or shoulder (TSA). \*One patient can present multiple conditions.**

**Table A.3**

**Review of mismatch stays not included in the cohort, by missing data source and by joint.**

|                                                               | Hip stays                                                                                                                                                                                                                                                                                                                                                                                                                                                                                                                                                                                | Knee stays                                                                                                                                                                                                                                                                                                                 | Shoulder stays                                                                                                                                                                              |
|---------------------------------------------------------------|------------------------------------------------------------------------------------------------------------------------------------------------------------------------------------------------------------------------------------------------------------------------------------------------------------------------------------------------------------------------------------------------------------------------------------------------------------------------------------------------------------------------------------------------------------------------------------------|----------------------------------------------------------------------------------------------------------------------------------------------------------------------------------------------------------------------------------------------------------------------------------------------------------------------------|---------------------------------------------------------------------------------------------------------------------------------------------------------------------------------------------|
| "LPP but no CPT": STUDIO LPP list but no replacement CPT code | <p>Among all the stays associated with a hip LPP code record, the proportion without hip replacement arthroplasty (CPT codes) record was 20.7% (n= 1,728):</p>                                                                                                                                                                                                                                                                                                                                                                                                                           | <p>Among all the stays associated with a knee LPP code, the proportion without knee replacement arthroplasty represented 22.4% (n= 885):</p>                                                                                                                                                                               | <p>Among all the stays with a shoulder LPP code, the proportion without shoulder replacement arthroplasty represented 12.4% (n= 177):</p>                                                   |
|                                                               | 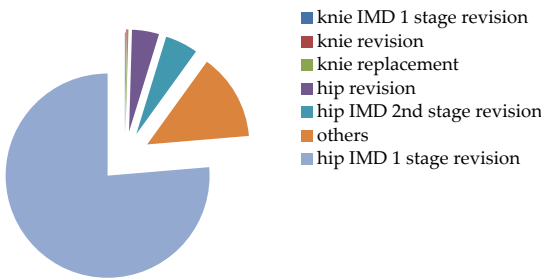                                                                                                                                                                                                                                                                                                                                                                                                                                                                                                        |                                                                                                                                                                                                                                          |                                                                                                          |
|                                                               | <p><b>Fig. A1.</b><br/>Proportion of procedure code records among all stays with hip device code recorded</p>                                                                                                                                                                                                                                                                                                                                                                                                                                                                            | <p><b>Fig. A2.</b><br/>Proportion of procedure code records among all stays with knee device code recorded</p>                                                                                                                                                                                                             | <p><b>Fig. A3.</b><br/>Proportion of procedure code records among all stays with shoulder device code recorded</p>                                                                          |
|                                                               | <p>The remaining stays identified as "other" involved stays with a CPT code for joint debridement (e.g., because of arthritis), osteosynthesis, prosthesis removal, failure according to the pharmacy database.</p>                                                                                                                                                                                                                                                                                                                                                                      | <p>The remaining stays identified as "other" involved reconstruction of the anterior cruciate knee ligament, suture of the meniscus and joint debridement, missing CPT record, record mismatch (CPT coded on the stay before/after the LPP record stay or another joint's CPT code), failure in knee IMD implantation.</p> | <p>The remaining stays identified as "other" involved shoulder joint debridement, humeral osteosynthesis and record mismatch (LPP code associated with a stay before the arthroplasty).</p> |
| "CPT but no LPP": replacement CPT but no STUDIO LPP list code | <p>Among the THA stays identified by hospital discharge DB, 0.9% (n= 29) were not associated with a hip IMD in pharmacy records as defined in our <i>STUDIO LPP list</i>. These cases did not involve THA, but other hip surgery (i.e. hemi arthroplasty for femoral fracture) or no arthroplasty at all (bone biopsy, fracture with immobilisation). Few stays presented an IMD record mismatch (another hospital stay, e.g. consulting, follow-up care and rehabilitation, etc.) or no registered pharmacy IMD at all even though surgery reports were founded comforting the THA.</p> | <p>Among the TKA stays identified by hospital discharge DB, 1.7% (n=28) were not associated with a knee IMD from the <i>STUDIO LPP list</i>. Half of these presented a reconstruction IMD, and one had a hip IMD.</p>                                                                                                      | <p>Among the TSA stays identified by hospital discharge DB, 0.8% (n= 6) were not associated with a shoulder IMD from the <i>STUDIO LPP list</i>. They involved other procedures.</p>        |
